# Supplementary material
Source: Springer Nature journal article supplement (https://www.springermedizin.de/resource/supplementary/12889_2011_3338_MOESM2_ESM.pdf/9488854)

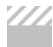

Without central obesity

With central obesity

Men

Women

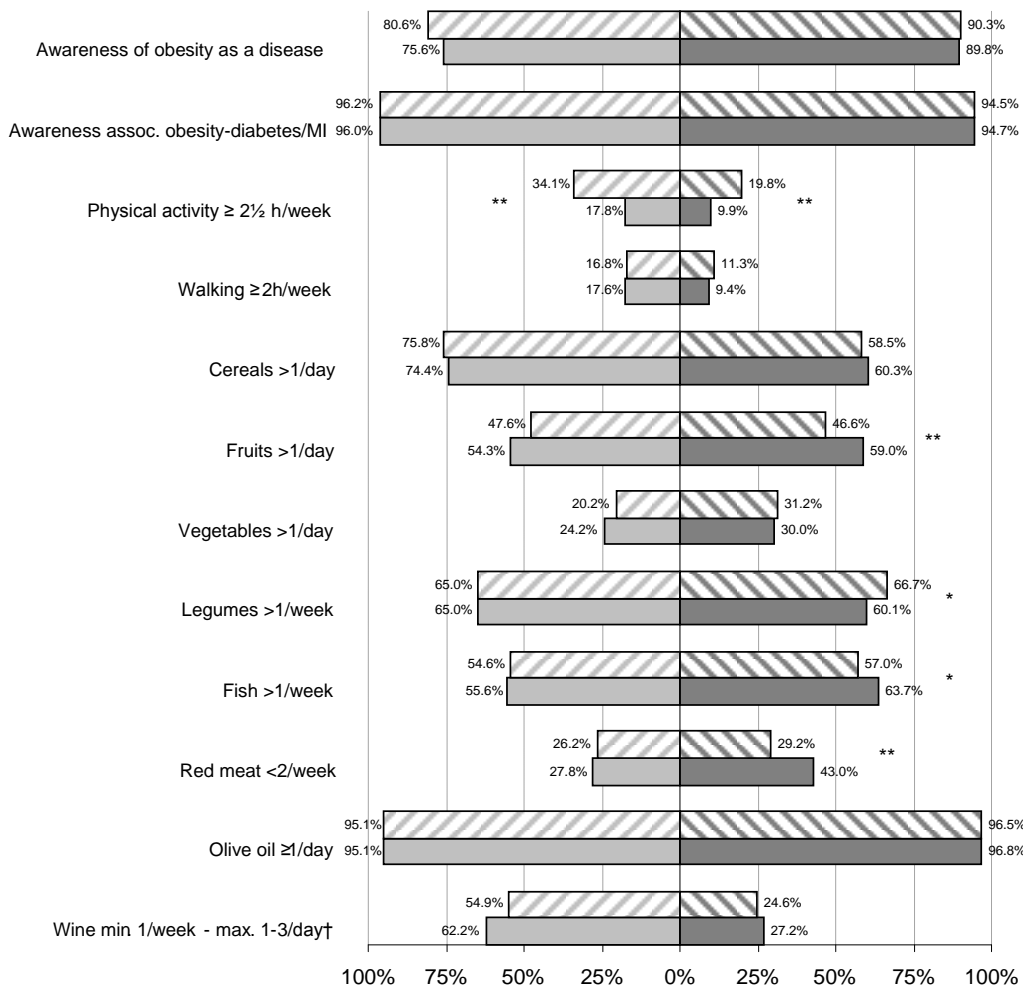

Supplement: MOESM2 [file 9488854]
